# Supplementary material for: Inhibition of Lipid Accumulation and Cyclooxygenase-2 Expression in Differentiating 3T3-L1 Preadipocytes by Pazopanib, a Multikinase Inhibitor
Source: MDPI journal article supplement (doi:10.3390/ijms22094884), 2021-05-05
Supplement: s1 [file s1]

**Supplementary Table S1.** List of antibodies used for Western blot analysis.

| Antibodies                  | Dilution Used | Source                              | Catalog No. |
|-----------------------------|---------------|-------------------------------------|-------------|
| <i>Primary Antibodies</i>   |               |                                     |             |
| C/EBP- $\alpha$             | 1:2,000       | Santa Cruz Biotechnology            | sc-61       |
| PPAR- $\gamma$              | 1:2,000       | Santa Cruz Biotechnology            | sc-7272     |
| p-STAT-3 (Y705)             | 1:2,000       | Santa Cruz Biotechnology            | sc-8059     |
| STAT-3                      | 1:2,000       | Santa Cruz Biotechnology            | sc-8019     |
| Perilipin A                 | 1:2,000       | BioVision                           | #3948-200   |
| FAS                         | 1:2,000       | BD Bioscience                       | #9452       |
| p-AMPK (T172)               | 1:2,000       | Cell signalling                     | #2535       |
| AMPK                        | 1:2,000       | Cell signalling                     | #2793       |
| p-ACC (S79)                 | 1:2,000       | Cell signalling                     | #3661       |
| ACC                         | 1:2,000       | Cell signalling                     | #3662       |
| p-HSL (S563)                | 1:2,000       | Cell signalling                     | #4139       |
| p-HSL (S660)                | 1:2,000       | Cell signalling                     | #4126       |
| HSL                         | 1:2,000       | Cayman chemical                     | #10006371   |
| COX-2                       | 1:2,000       | Cayman chemical                     | #160106     |
| $\beta$ -Actin              | 1:10,000      | Sigma                               | A5441       |
| <i>Secondary Antibodies</i> |               |                                     |             |
| Goat anti-rabbit IgG-HRP    | 1:5,000       | Jackson ImmunoResearch Laboratories | 111-035-045 |
| Goat anti-mouse-IgG-HRP     | 1:5,000       | Jackson ImmunoResearch Laboratories | 115-035-062 |

**Supplementary Table S2.** Sequences of primers used for quantitative real-time PCR.

| Gene            | Forward                 | Reverse                  |
|-----------------|-------------------------|--------------------------|
| C/EBP- $\alpha$ | TTACAACAGGCCAGGTTTCC    | CTCTGGGATGGATCGATTGT     |
| PPAR- $\gamma$  | GGTGAAACTCTGGGAGATTC    | CAACCATTGGGTCAGCTCTC     |
| FAS             | TTGCTGGCACTACAGAATGC    | AACAGCCTCAGAGCGACAAT     |
| Perilipin A     | CTTTCTCGACACACCATGGAAAC | CCACGTTATCCGTAACACCCTTCA |
| Leptin          | CCAAAACCCTCATCAAGACC    | CTCAAAGCCACCACCTCTGT     |
| Resistin        | CCGATGAGCAGTCA CCTCCA   | CAGCTGCTTCGCCTCGTCCTCCT  |
| 18S rRNA        | GGTGAAGGTCGGTGTGAACG    | GGTAGGAACACGGAAGGCCA     |

**Supplementary Table S3.** Sequences of primers used for reverse-transcription polymerase chain reaction (RT-PCR).

| Gene  | Forward                     | Reverse                     |
|-------|-----------------------------|-----------------------------|
| COX-2 | TTGAAGACCAGGAGTACAGC        | GGTACAGTTCATGACATCG         |
| Actin | TCATGAAGTGTGACGTT-GACATCCGT | CCTAGAAGCATTTGCGGTGCAC-GATG |
